# Supplementary figures and images for: Mental Health Apps: Ensuring Quality and Reimbursement Through a Dynamic Payment Formulary
Source: Atypon-hosted journal article supplement (doi:10.1176/appi.ps.202000754), 2021-05-01

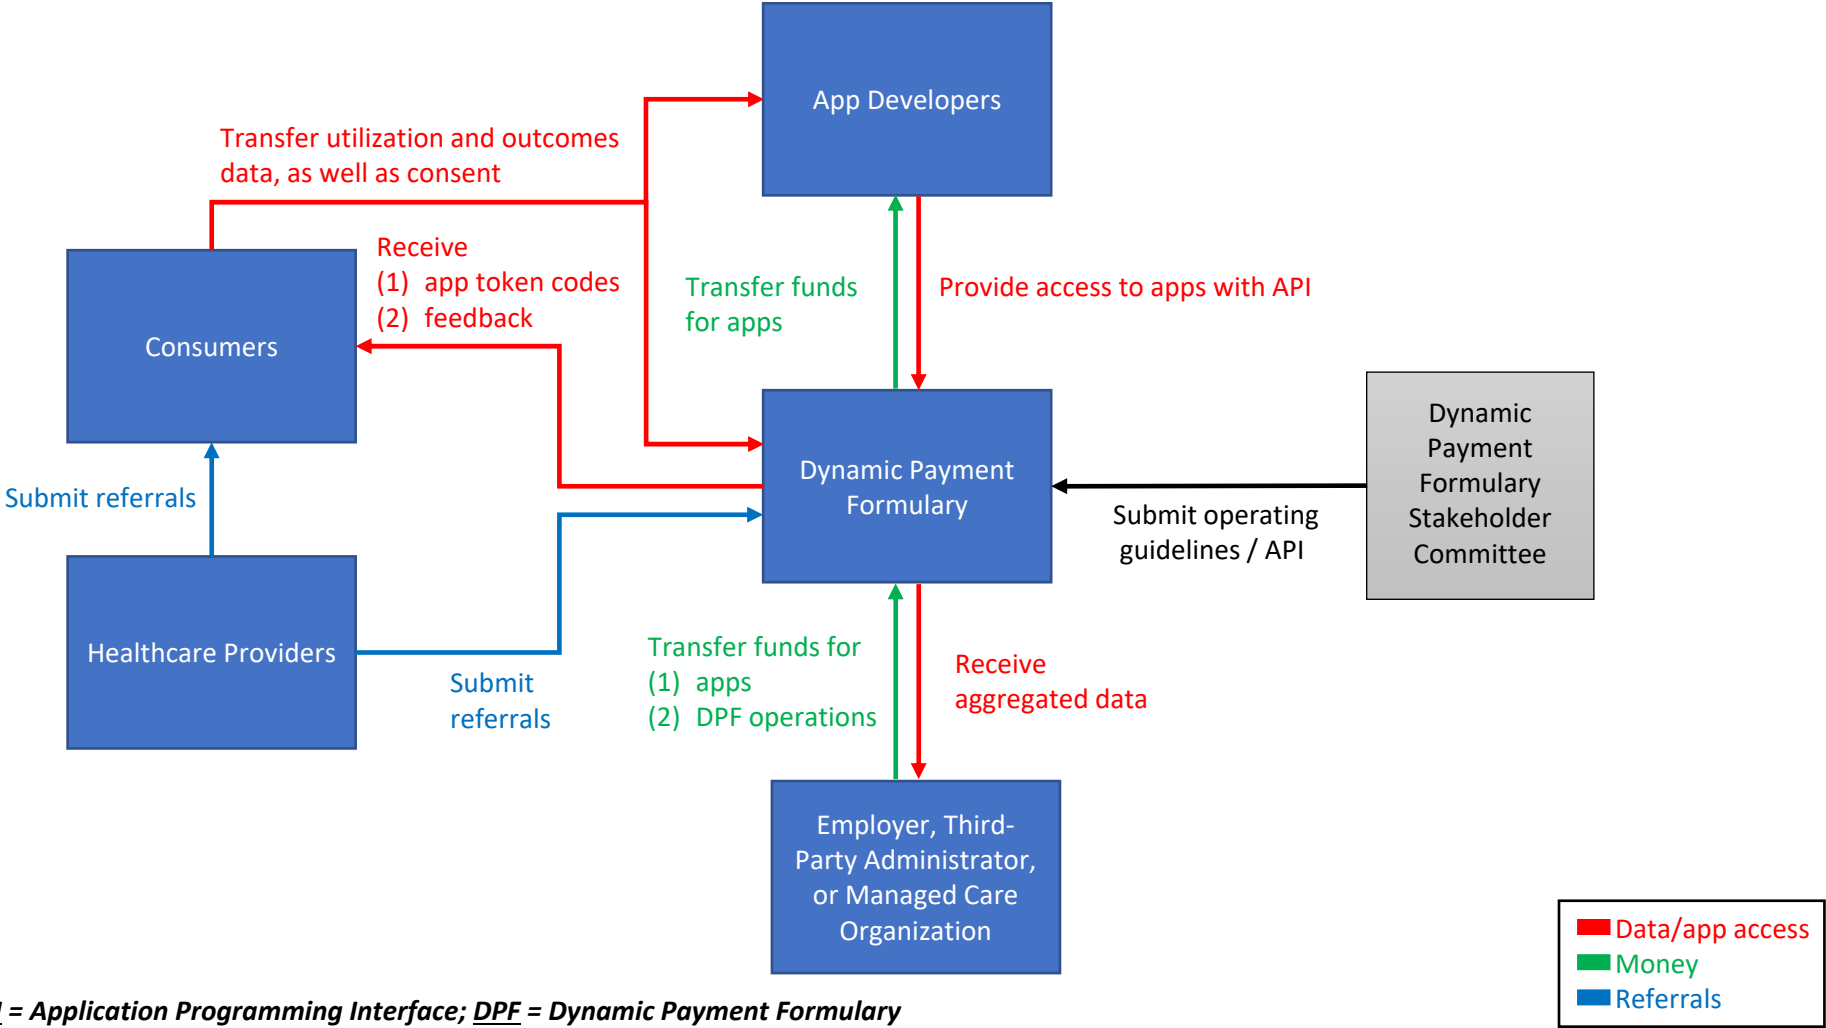

Supplement: appi.ps.202000754.ds001.pdf [file appi.ps.202000754.ds001.pdf]
